RESEARCH ARTICLE

# Reference values of brachial-ankle pulse wave velocity according to age and blood pressure in a central Asia population

Gulinuer Yiming<sup>1,2☯‡</sup>, Xianhui Zhou<sup>1☯‡</sup>, Wenkui Lv<sup>1</sup>, Yi Peng<sup>2</sup>, Wenhui Zhang<sup>1</sup>, Xinchun Cheng<sup>1</sup>, Yaodong Li<sup>1</sup>, Qiang Xing<sup>1</sup>, Jianghua Zhang<sup>1</sup>, Qina Zhou<sup>1</sup>, Ling Zhang<sup>1</sup>, Yanmei Lu<sup>1</sup>, Hongli Wang<sup>1</sup>, Baopeng Tang<sup>1\*</sup>

**1** Pacing and Electrophysiological Department, The First Affiliated Hospital of Xinjiang Medical University, Urumqi, Xinjiang, China, **2** Department of Cardiac Function, The First Affiliated Hospital of Xinjiang Medical University, Urumqi, Xinjiang, China

☯ These authors contributed equally to this work.

‡ These authors are joint senior authors on this work

\* [tangbaopeng@hotmail.com](mailto:tangbaopeng@hotmail.com)

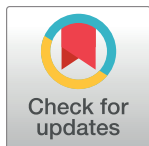

## Abstract

### Background

Brachial-ankle pulse wave velocity (baPWV), a direct measure of aortic stiffness, has increasingly become an important assessment for cardiovascular risk. The present study established the reference and normal values of baPWV in a Central Asia population in Xinjiang, China.

### Methods

We recruited participants from a central Asia population in Xinjiang, China. We performed multiple regression analysis to investigate the determinants of baPWV. The median and 10th-90th percentiles were calculated to establish the reference and normal values based on these categories.

### Results

In total, 5,757 Han participants aged 15–88 years were included in the present study. Spearman correlation analysis showed that age ( $r = 0.587$ ,  $p < 0.001$ ) and mean blood pressure (MBP,  $r = 0.599$ ,  $p < 0.001$ ) were the major factors influencing the values of baPWV in the reference population. Furthermore, in the multiple linear regression analysis, the standardized regression coefficients of age (0.445) and MBP (0.460) were much higher than those of body mass index, triglyceride, and glycemia (-0.054, 0.035, and 0.033, respectively). In the covariance analysis, after adjustment for age and MBP, only diabetes was the significant independent determinant of baPWV ( $p = 0.009$ ). Thus, participants with diabetes were excluded from the reference value population. The reference values ranged from 14.3 to 25.2 m/s, and the normal values ranged from 13.9 to 21.2 m/s.

### OPEN ACCESS

**Citation:** Yiming G, Zhou X, Lv W, Peng Y, Zhang W, Cheng X, et al. (2017) Reference values of brachial-ankle pulse wave velocity according to age and blood pressure in a central Asia population. PLoS ONE 12(4): e0171737. <https://doi.org/10.1371/journal.pone.0171737>

**Editor:** Petter Bjornstad, University of Colorado Denver School of Medicine, UNITED STATES

**Received:** May 12, 2016

**Accepted:** January 25, 2017

**Published:** April 12, 2017

**Copyright:** © 2017 Yiming et al. This is an open access article distributed under the terms of the [Creative Commons Attribution License](https://creativecommons.org/licenses/by/4.0/), which permits unrestricted use, distribution, and reproduction in any medium, provided the original author and source are credited.

**Data Availability Statement:** All relevant data are within the paper and its Supporting Information files.

**Funding:** The authors received specific funding for this work. This work was supported by National Natural Science Foundation of China (81570297).

**Competing interests:** The authors have declared that no competing interests exist.

## Conclusions

This is the first study that has established the reference and normal values for baPWV according to age and blood pressure in a Central Asia population.

## Introduction

In recent years, great emphasis has been placed on the role of aortic stiffness in the development of cardiovascular diseases. Increased arterial stiffness, particularly of the central arterial segments, has been demonstrated to be associated with increased cardiovascular risk and an independent predictor of stroke [1–5]. With aging, stiffening of the arterial system may lead to an increase in aortic systolic pressure and subsequent stress on smaller arterial vessels, a decrease in aortic diastolic pressure, and left ventricular hypertrophy, consequently damaging the heart [6–10].

Pulse wave velocity (PWV) is known as a key indicator of arterial stiffness [10–11]. Although, PWV of the aorta has been used as the standard method of measuring arterial stiffness, PWV can be measured in other arterial regions, such as heart-brachial (hb), heart-carotid (hd), femoral-ankle (fa) segment. In recent years, especially in Japan and other Asian countries, brachial-ankle pulse wave velocity (baPWV) is now widely used for its simple, convenient and automatic method of measuring PWV [12–15]. Several studies have also shown that a high brachial-ankle pulse wave velocity (baPWV) is a predictor of mortality and cardiovascular events in different patient cohorts [16–22]. To verify whether baPWV is a surrogate end point for cardiovascular disease, Vlachopoulos et al. [17] performed a meta-analysis that involved 18 studies, and their results showed that an increase in baPWV by 1 m/s corresponded with an increase of 12%, 13%, and 6% in total cardiovascular events, cardiovascular mortality, and all-cause mortality, respectively.

Despite the great importance of baPWV in the clinical setting, a complete database of reference values is not yet available for the Central Asia population. The aim of this study was to investigate the major influencing factors of baPWV and to establish the reference values of baPWV that take these influencing factors into consideration in Xinjiang, China.

## Methods

### Ethical approval of the study protocol

This study was approved by the Ethics Committee of the First Affiliated Hospital of Xinjiang Medical University and was conducted according to the standards of the Declaration of Helsinki. Written, informed consent was obtained from the participants. We obtain the written informed consent from the next of kin, caretakers, or guardians on behalf of the minors/children enrolled in our study.

### BaPWV measurement

BaPWV was measured using the Vascular Profiler-1000 device (VP1000; Colin, Komaki, Japan) as previously described [23]. Briefly, VP1000 is a device with four cuffs that can measure blood pressure levels in the arms and legs and simultaneously record pulse waves using an oscillometric cuff technique. The device may estimate the travel path from body height and is able to compute baPWV automatically as the ratio of the travel path divided by the time difference between the pulse waves that are transmitted to the brachial and ankle arteries. This

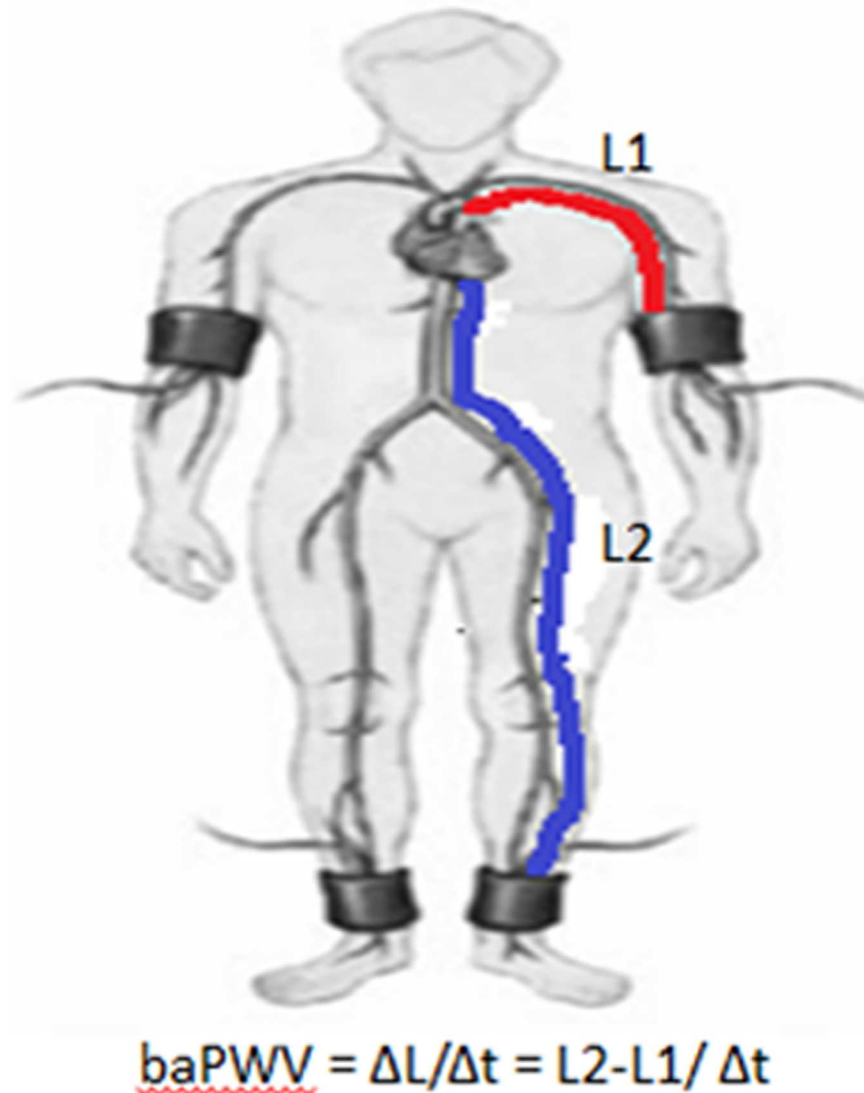

**Fig 1. The working principle of baPWV measurement.** The distance from heart to the brachial arteries is marked by the red lines and is represented by L1. The distance from heart to the ankle arteries is marked by the blue lines and is represented by L2. Thus,  $\text{baPWV} = \Delta L / \Delta t = L2 - L1 / \Delta t$ .

<https://doi.org/10.1371/journal.pone.0171737.g001>

device is useful for mass medical examinations and studies because it enables measurements of baPWV in a short time without influence of the operator's technique. The working principle is shown in Fig 1. Because of the significant positive correlation between the right and left baPWVs, we used the mean value of the right and left baPWVs during our analysis.

### Field work

Information on demographics, socioeconomic status, dietary habits, and medical history of each participant was collected by trained researchers using questionnaires. Height and body weight were measured as described previously. Three sitting blood pressure measurements were obtained using mercury sphygmomanometers after a 10-minute rest period, and the average of each measurement was used for data analysis. If the results differed by more than 5 mmHg, additional measurements were done. Mean blood pressure (MBP) was calculated

from the systolic and diastolic blood pressures (SBP and DBP, respectively) as  $MBP = DBP + 0.4(SBP - DBP)$ .

## Biochemical analyses

We measured the concentrations of serum total cholesterol (TC), triglyceride (TG), fasting glucose, low-density lipoprotein (LDL), high-density lipoprotein (HDL), using a biochemical analyzer (Dimension AR/AVL Clinical Chemistry System, Newark, NJ, USA).

## Definition of risk factors

Hypertension was defined as having an SBP  $\geq 140$  mmHg, DBP  $\geq 90$  mmHg, or if taking any antihypertensive medications. Furthermore, grade I hypertension was defined as an SBP  $\geq 140$  but  $\leq 159$  mmHg and a DBP  $\geq 90$  mmHg but  $\leq 99$  mmHg. Grade II hypertension was defined as an SBP  $\geq 160$  but  $\leq 179$  mmHg and a DBP  $\geq 100$  mmHg but  $\leq 109$  mmHg. Grade III was defined as an SBP  $\geq 180$  mmHg and a DBP  $\geq 110$  mmHg. Grade II/III hypertension was defined as an SBP  $\geq 160$  mmHg and a DBP  $\geq 100$  mmHg.

Participants were considered to have dyslipidemia if with TC concentration  $> 5.2$  mmol/L, TG concentration  $> 1.7$  mmol/L, LDL cholesterol concentration  $> 3.1$  mmol/L, HDL cholesterol concentration  $< 1.04$  mmol/L, and/or taking a hypolipidemia drug.

Diabetes was defined as fasting plasma glucose level of at least 7.0 mmol/L, taking insulin or oral hypoglycemic agents, or a self-reported history of diabetes.

## Statistical analysis

Data analysis was performed using SPSS version 17.0 for Windows (SPSS, Chicago, IL, USA). Continuous variables were given as mean (standard deviation, SD), and the categorical variables were given as percentages. Correlations were assessed using multiple regression analyses. The influence of cardiovascular risk factors and sex on baPWV was examined by analysis of covariance, before and after adjustment for age and MBP. PWV values are represented as mean (SD) and median (10th–90th percentile). A high baPWV was defined as the 90th percentiles in each age and blood pressure category.

## Results

### Baseline characteristics of the study participants

In total, 5,076 Han participants with complete data were enrolled in the present study, of whom 2,639 were male and 2,437 were female. The age of the participants ranged from 15 to 88 years, with a mean (SD) of 52.53 (12.65) years [24, 25]. Table 1 shows the demographic parameters and clinical data of the total population, reference value population, and normal value population. Total population was defined as Han participants with complete data. A total of 4,679 participants without overt cardiovascular disease and diabetes from the total population were assigned as the reference value population; 364 participants from the reference value population without dyslipidemia and are nonsmokers were assigned as the normal-value population. The detail methodology behind the recruitment is as Fig 2.

### Multiple linear regression analyses on baPWV

Before establishing the reference values for baPWV, the major determinants of baPWV were examined. Spearman correlation analyses were performed between baPWV and age, body mass index (BMI), MBP, TG, TC, HDL-C, LDL-C, and glycemia in the reference value population (Table 2). Multiple regression analysis using baPWV as a dependent variable was also

**Table 1. Characteristics of study population.**

| Parameter               | Total population | Reference value population | Normal value population |
|-------------------------|------------------|----------------------------|-------------------------|
| Number                  | 5076             | 4679                       | 364                     |
| Age(years)              | 52.53(12.65)     | 52.13(12.59)               | 44.95(9.66)             |
| Age range(years)        | (15–88)          | (22–88)                    | (25–82)                 |
| Male(%)                 | 2639(52)         | 2465(52.7)                 | 300(82.4)               |
| BMI(kg/m <sup>2</sup> ) | 25.11(3.51)      | 25.02(3.51)                | 23.06(2.79)             |
| SBP(mmHg)               | 132.68(19.92)    | 131.75(19.56)              | 116.52(10.51)           |
| DBP(mmHg)               | 85.12(15.58)     | 84.65(15.41)               | 74.52(9.48)             |
| MBP(mmHg)               | 104.14(15.89)    | 103.49(15.66)              | 91.32(8.33)             |
| TG(mmol/L)              | 1.70(1.40)       | 1.62(1.22)                 | 0.90(0.33)              |
| TC(mmol/L)              | 4.69(1.08)       | 4.66(1.07)                 | 4.05(0.73)              |
| HDL-C(mmol/L)           | 1.25(0.45)       | 1.25(0.45)                 | 1.46(0.32)              |
| LDL-C(mmol/L)           | 2.87(0.91)       | 2.88(0.91)                 | 2.44(0.46)              |
| Glycaemia(mmol/L)       | 5.32(1.78)       | 4.95(0.73)                 | 4.73(0.69)              |
| Smoking(%)              | 1605(31.6)       | 1457(31.1)                 |                         |
| Hypertention(%)         | 1985(39.1)       | 1748(37.4)                 |                         |
| Dyslipidemia(%)         | 4063(80.04)      | 3719(79.48)                |                         |
| Diabetes(%)             | 397(7.8)         |                            |                         |

y, years; SD, standard deviation; BMI, body mass index; SBP, systolic blood pressure; DBP, diastolic blood pressure; MBP, mean blood pressure; TG, triglyceride; TC, total cholesterol; HDL-C, high-density lipoprotein cholesterol; LDL-C, low-density lipoprotein cholesterol.

<https://doi.org/10.1371/journal.pone.0171737.t001>

performed in the reference value population (Table 3). The linear regression equation is as follows:  $baPWV (m/s) = -292.9 + 13.3 * age (years) - 5.8 * BMI (kg/m^2) + 11.1 * MBP (mmHg) + 10.8 * TG (mmol/L) + 16.7 * glycemia (mmol/L)$ . This equation explains 53.2% of the baPWV variance.

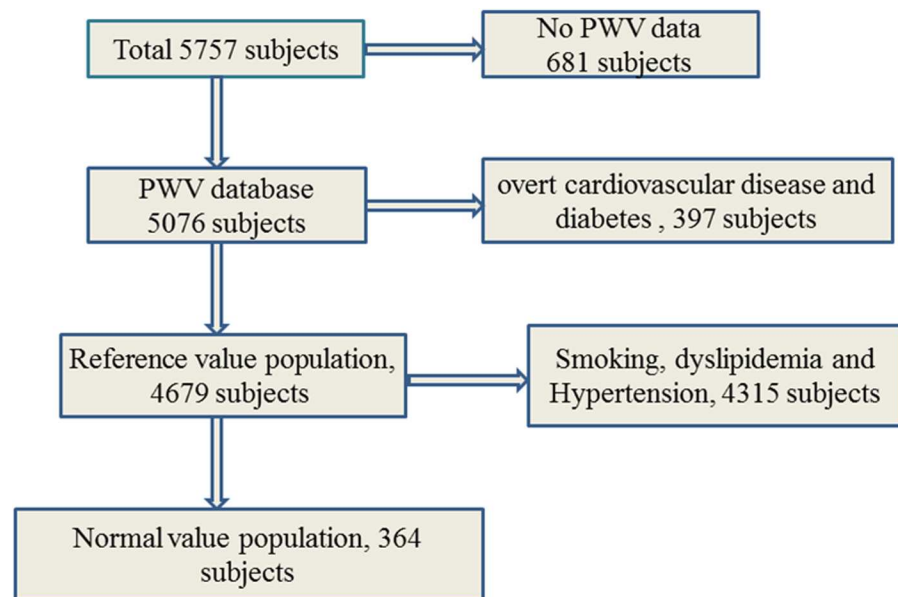

**Fig 2. Flowchart describing the selection and categorization of subjects from the reference value database for the present analysis.**

<https://doi.org/10.1371/journal.pone.0171737.g002>

**Table 2. Spearman correlation analysis on brachial-ankle pulse wave velocity (baPWV).**

| Variable  | r value | P value |
|-----------|---------|---------|
| age       | 0.587   | <0.001  |
| BMI       | 0.197   | <0.001  |
| MBP       | 0.599   | <0.001  |
| TG        | 0.104   | <0.001  |
| TC        | 0.107   | <0.001  |
| HDL-C     | -0.011  | 0.442   |
| LDL-C     | -0.03   | 0.037   |
| Glycaemia | 0.091   | <0.001  |

baPWV, brachial-ankle pulse wave velocity; BMI, body mass index; MBP, mean blood pressure; TG, triglyceride; TC, total cholesterol; HDL-C, high-density lipoprotein cholesterol; LDL-C, low-density lipoprotein cholesterol.

<https://doi.org/10.1371/journal.pone.0171737.t002>

Table 4 shows the analysis of covariance on baPWV. Before adjustment, the univariate analysis showed that baPWV was significantly higher in males, those with dyslipidemia and/or diabetes, and smokers (all  $p < 0.001$ ). However, after adjustment for age and MBP, there was no significant effect of sex, dyslipidemia, and smoking on baPWV ( $p = 0.316, 0.652, \text{ and } 0.215$ , respectively). Only diabetes was a significant independent determinant of baPWV ( $p = 0.009$ ). Therefore, participants with diabetes were excluded from the reference value population.

## Reference and normal values for PWV

Table 5 shows the mean and reference values of baPWV according to age and MBP in the reference value population. Both mean values and reference values were observed to increase together with increasing age and blood pressure categories. The mean values ranged from 12.3 to 20.3 m/s, and the reference values ranged from 14.3 to 25.2 m/s. Table 6 shows the mean and normal values of baPWV in the normal value population. The mean values range from 12.0 to 16.3 m/s, and the normal values, from 13.9 to 21.2 m/s.

## Discussion

Lesions in arterial vascular structures marked by atherosclerosis and arteriosclerosis are the basis of various cardiovascular diseases [4, 9]. As changes in arterial stiffness occur earlier than those in arterial vascular structures, detection of arterial stiffness may play an important role in the prevention of a series of major cardiovascular diseases [3]. Several studies have demonstrated that PWV is an independent predictor of coronary heart disease and stroke in seemingly healthy subjects [16, 26]. baPWV is a new and noninvasive measurement of arterial stiffness and has been widely used in health examinations and screenings in East Asian countries [14, 15]. baPWV has been demonstrated to be associated with population, age, blood pressure, and many other risk factors. The present study determined and evaluated for the first time the reference values of baPWV according to age and blood pressure in Xinjiang, China. In addition, the association between baPWV and cardiovascular disease risk factors was investigated.

Previous studies have demonstrated that traditional atherosclerotic risk factors such as diabetes mellitus, dyslipidemia, smoking, and hypertension may influence baPWV [27, 28]. An increasing number of studies have recently reported that baPWV increases with age, and this is mainly due to degeneration and decreased elasticity of the arterial wall [29]. Miyai et al. [30] claimed that age was one of the significant determinants of baPWV in a Japanese population,

**Table 3. Multiple regression analysis using baPWV as dependent variable.**

| Variable  | Non-standardiz | standardiz | t      | p value | R2    |
|-----------|----------------|------------|--------|---------|-------|
| Constant  | -292.898       |            | -7.466 | <0.001  | 0.532 |
| Age       | 13.334         | 0.445      | 41.627 | <0.001  |       |
| BMI       | -5.831         | -0.054     | -4.956 | <0.001  |       |
| MBP       | 11.092         | 0.46       | 40.679 | <0.001  |       |
| TG        | 10.831         | 0.035      | 3.315  | 0.001   |       |
| Glycaemia | 16.718         | 0.033      | 3.139  | 0.001   |       |

baPWV, brachial-ankle pulse wave velocity; BMI, body mass index; MBP, mean blood pressure; TG, triglyceride.

<https://doi.org/10.1371/journal.pone.0171737.t003>

and Ai et al. [21] had the same conclusion in a Chinese population. Meanwhile, a study including 131 apparently healthy Japanese without a history of cardiovascular disease suggested that both age ( $p = 0.022$ ) and blood pressure ( $p < 0.001$ ) were the strongest independent determinants of baPWV [31]. The Framingham study performed by Mitchel G et al suggested that higher pulse pressure at any age and higher pulse pressure with advancing age is predominantly associated with PWV [13]. In the present study, baPWV was relatively strongly associated with age and blood pressure, but a weak association exists between baPWV and BMI, TG, and glycemia according to the multiple regression analysis. This indicates that age and blood pressure play a key role in baPWV. Hence, we considered age and MBP when establishing the reference values of baPWV in the present study.

The cutoff points of high baPWV can be represented in different ways. Important differences exist among ethnicities, and many cardiovascular risk factors may influence baPWV [22]. As mentioned above, baPWV is greatly influenced by age and blood pressure; thus, we should take these two confounders into consideration when establishing cutoff points of high baPWV. Otherwise, the prevalence of “high baPWV” would increase dramatically with increase in age and blood pressure. Thus, the cutoff points of high baPWV are represented by age and blood pressure categories.

**Table 4. Influence of gender, dyslipidemia, Diabetes and smoking on baPWV(m/s) before and after adjustment for age and mean blood pressure (MBP).**

|              | subjects | Mean age     | P      | MBP           | P      | PWV before adjustment |         | PWV after adjustment |         |
|--------------|----------|--------------|--------|---------------|--------|-----------------------|---------|----------------------|---------|
|              |          |              |        |               |        | Mean                  | P value | Mean                 | P value |
| Gender       |          |              |        |               |        |                       |         |                      |         |
| Female       | 103      | 51.80(14.33) | <0.001 | 102.61(12.36) | <0.001 | 14.9                  | <0.001  | 13.7                 | 0.316   |
| Male         | 364      | 46.01(9.83)  |        | 95.02(12.79)  |        | 13.2                  |         | 13.5                 |         |
| Dyslipidemia |          |              |        |               |        |                       |         |                      |         |
| NO           | 467      | 47.28(11.22) | <0.001 | 96.70(13.07)  | <0.001 | 13.5                  | <0.001  | 14.8                 | 0.652   |
| YES          | 2510     | 52.94(12.35) |        | 103.34(15.94) |        | 15.1                  |         | 14.9                 |         |
| Diabetes     |          |              |        |               |        |                       |         |                      |         |
| NO           | 467      | 47.28(11.22) | <0.001 | 111.56(14.76) | <0.001 | 13.5                  | <0.001  | 13.8                 | 0.009   |
| YES          | 39       | 57.33(12.04) |        | 127.79(19.32) |        | 17.3                  |         | 14.7                 |         |
| Smoking      |          |              |        |               |        |                       |         |                      |         |
| NO           | 467      | 47.28(11.22) | <0.001 | 96.7(13.07)   | <0.001 | 13.5                  | <0.001  | 14.1                 | 0.215   |
| YES          | 248      | 53.95(14.35) |        | 103.02(15.73) |        | 15.3                  |         | 14.3                 |         |

baPWV, brachial-ankle pulse wave velocity; MBP, mean blood pressure; PWV, pulse wave velocity.

<https://doi.org/10.1371/journal.pone.0171737.t004>

**Table 5. Reference value of baPWV(m/s) according to age and blood pressure.**

| Age class(years)                          | Blood pressure class |                 |                 |
|-------------------------------------------|----------------------|-----------------|-----------------|
|                                           | Normal               | GradeI          | GradeI/III      |
| <b>baPWV as mean(<math>\pm</math>2SD)</b> |                      |                 |                 |
| <40                                       | 12.3(9.3–15.3)       | 14.3(10.7–17.9) | 15.4(10.8–20)   |
| 40–49                                     | 12.7(10.1–15.3)      | 14.1(6.1–22.1)  | 15.7(10.5–20.9) |
| 50–59                                     | 13.9(10.1–17.7)      | 16.1(10.9–21.3) | 17.1(10.7–23.5) |
| >60                                       | 16.0(10.6–21.4)      | 18.4(11.8–25.0) | 20.3(11.7–28.9) |
| <b>baPWV as Median(10-90th)</b>           |                      |                 |                 |
| <40                                       | 12.2(10.4–14.3)      | 14.1(11.9–16.3) | 15.0(13.2–19.8) |
| 40–49                                     | 12.5(10.8–14.6)      | 13.8(11.7–16.6) | 15.2(12.8–19.0) |
| 50–59                                     | 13.5(11.8–16.4)      | 16.0(12.9–19.2) | 16.4(13.8–21.6) |
| >60                                       | 15.7(12.8–19.2)      | 17.8(14.8–22.4) | 19.6(15.9–25.2) |

baPWV, brachial-ankle pulse wave velocity; SD, standard deviation.

<https://doi.org/10.1371/journal.pone.0171737.t005>

Furthermore, we performed covariance analysis to verify whether other cardiovascular risk factors also influence baPWV after adjustment for age and blood pressure. The result of the univariate analysis showed that significant difference exists in baPWV between males and females, between those with dyslipidemia and normal lipid levels, and between smokers and nonsmokers. However, after adjustment for age and MBP, the difference disappeared, and this may be due to the different ages and MBPs in each subgroup. The study by Adams MR et al suggested that the increasing of estrogen will inhibit the formation of atherosclerotic plaques and reduce arterial stiffness [32]. Rajkumar C et al performed a study and found that long-term hormonal therapy in postmenopausal woman significantly reduces aorto-femoral PWV and increases systemic arterial compliance compared with age-match control subjects not using such therapy [33]. Thus some researchers suggested that sex may influence the PWV. While, others had the different opinion. Both Smulyan H and Mattae performed the relevant researches and suggested that there exists no significant difference of PWV between male and female [34]. In our study, after adjustment for age and MBP, the difference of baPWV between male and female disappeared. The reason for the different results may be that we should adjust for influencing factors of baPWV when analysing the relationship between sex and baPWV. However, baPWV was significantly higher in subjects with diabetes than in normal subjects after adjustment for age and MBP. All the data above indicated that sex, lipid status, and smoking could not influence baPWV independently after adjustment for age and MBP; however, diabetes was a significant independent determinant of baPWV. Hence, the reference value population did not include participants with diabetes.

In accordance with the consideration above, we established the reference values and normal values according to age and blood pressure. The values of baPWV were represented as means

**Table 6. Normal values of baPWV(m/s).**

| Age class(years) | n   | Mean( $\pm$ 2SD) | Median(10-90th) |
|------------------|-----|------------------|-----------------|
| <40              | 94  | 12.0(9–15)       | 11.7(10.3–13.9) |
| 40–49            | 185 | 12.0(9–15)       | 11.9(10.4–14.0) |
| 50–59            | 49  | 13.9(10.1–17.7)  | 13.6(12.1–16.4) |
| >60              | 36  | 16.3(10.3–22.3)  | 16.4(13.1–21.2) |

baPWV, brachial-ankle pulse wave velocity; SD, standard deviation.

<https://doi.org/10.1371/journal.pone.0171737.t006>



and medians simultaneously. High baPWV was defined as the 90th percentiles in each age and MBP category. In the previous studies, several fixed threshold values of baPWV had been suggested. Yamashina et al. [12] defined 1,400 cm/s as a cutoff point to discriminate patients with either stroke or coronary heart disease. Han et al. [19] demonstrated that the baPWV level (cutoff, 1,704 cm/s) was an independent predictor of cardiovascular events, especially ischemic stroke in the general population. However, once these threshold values were used in the clinical setting, a large number of elderly or hypertensive subjects were diagnosed as having high baPWV, which means that 47.9% (2,239/4,679) of the subjects of the present study are at risk. Obviously, it is more precise to establish reference values according to age and blood pressure than fixed thresholds.

baPWV has been increasingly used as an index of arterial stiffness in recent clinical research studies. The results of some studies suggested that baPWV can not only provide qualitatively similar information to those derived from aortic PWV but also arterial stiffness of peripheral arterial. While carotid-to-femoral/carotid-to-radial PWV can only reflect the aortic PWV [12]. This is the difference between baPWV and cfPWV/crPWV. However, although aortic PWV is accurate, it may not be ideal for routine use in cross-sectional study because of the repeatability and difficulty of measuring cfPWV. Additionally, some subjects may feel uncomfortable exposing the inguinal area during the acquisition of femoral pressure waveforms. On the contrary, baPWV is a relatively simpler method to measure PWV, It just requires patients placing blood pressure cuffs on the four extremities, and the Vascular Profiler-1000 device may calculate the baPWV automatically [14]. The method using PC-MRI to measure PWV is a more accurate techniques. It is a intuitive and objective way with less estimation to measure PWV [15]. Though it has so many advantages, it exists some disadvantage too. First of all, the method using PC-MRI to measure PWV cost too much, most people can not afford the cost in China. Second, it has a more complex operation procedure than baPWV, and is not suitable for cross-sectional study. Additionally, people with MRI contraindication can not measure PWV in this way. Compared with cfPWV and PC-MRI-based method, though baPWV has many shortages, it is still a more convenient and economical way to estimate arterial stiffness in cross-sectional study.

In conclusion, age and blood pressure are the most important factors influencing baPWV. The other factors associated with baPWV were BMI, TG, and glycemia. The reference and normal values of baPWV in the Central Asia population were established according to age and blood pressure in the present study. It is now possible to estimate whether subjects have a high baPWV in a certain age and blood pressure category.

## Supporting information

**S1 Table. Raw data.** Complementary information on raw data. (XLSX)

## Author Contributions

**Conceptualization:** GY.

**Data curation:** QZ LZ.

**Formal analysis:** Y. Li.

**Funding acquisition:** BT.

**Investigation:** QX.

**Methodology:** WL.

**Project administration:** XZ.

**Resources:** JZ.

**Software:** WZ.

**Supervision:** BT.

**Validation:** XC.

**Visualization:** HW.

**Writing – original draft:** GY.

**Writing – review & editing:** Y. Lu YP.

## References

1. van Sloten TT, Protogerou AD, Henry RM, Schram MT, Launer LJ, Stehouwer CD. Association between arterial stiffness, cerebral small vessel disease and cognitive impairment: A systematic review and meta-analysis. *Neuroscience and Biobehavioral Reviews*. 2015 Jun; 53:121–30. <https://doi.org/10.1016/j.neubiorev.2015.03.011> PMID: 25827412
2. Agabiti-Rosei E, Porteri E, Rizzoni D. Arterial stiffness, hypertension, and rational use of nebivolol. *Vascular Health and Risk Management*. 2009; 5(1):353–60. PMID: 19475771
3. Mattace-Raso FU, van der Cammen TJ, Hofman A, van Popele NM, Bos ML, Schalekamp MA, et al. Arterial stiffness and risk of coronary heart disease and stroke: the Rotterdam Study. *Circulation*. 2006 Feb 7; 113(5):657–63. <https://doi.org/10.1161/CIRCULATIONAHA.105.555235> PMID: 16461838
4. Laurent S, Katsahian S, Fassot C, Tropeano AI, Gautier I, Laloux B, et al. Aortic stiffness is an independent predictor of fatal stroke in essential hypertension. *Stroke; A Journal of Cerebral Circulation*. 2003 May; 34(5):1203–6.
5. Laurent S, Boutouyrie P, Asmar R, Gautier I, Laloux B, Guize L, et al. Aortic stiffness is an independent predictor of all-cause and cardiovascular mortality in hypertensive patients. *Hypertension*. 2001 May; 37(5):1236–41. PMID: 11358934
6. Kang S, Fan HM, Li J, Fan LY, Miao AY, Bao Y, et al. Relationship of arterial stiffness and early mild diastolic heart failure in general middle and aged population. *European Heart Journal*. 2010 Nov; 31(22):2799–807. Epub 2010/08/28. eng. <https://doi.org/10.1093/eurheartj/ehq296> PMID: 20797980
7. Avolio AP, Chen SG, Wang RP, Zhang CL, Li MF, O'Rourke MF. Effects of aging on changing arterial compliance and left ventricular load in a northern Chinese urban community. *Circulation*. 1983 Jul; 68(1):50–8. Epub 1983/07/01. eng. PMID: 6851054
8. Watanabe H, Ohtsuka S, Kakihana M, Sugishita Y. Coronary circulation in dogs with an experimental decrease in aortic compliance. *Journal of the American College of Cardiology*. 1993 May; 21(6):1497–506. Epub 1993/05/01. eng. PMID: 8473662
9. London GM, Marchais SJ, Guerin AP, Pannier B. Arterial stiffness: pathophysiology and clinical impact. *Clinical and Experimental Hypertension (New York, NY)*. 2004 Oct-Nov; 26(7–8):689–99. Epub 2005/02/11. eng.
10. Terai M, Ohishi M, Ito N, Takagi T, Tatara Y, Kaibe M, et al. Comparison of arterial functional evaluations as a predictor of cardiovascular events in hypertensive patients: the Non-Invasive Atherosclerotic Evaluation in Hypertension (NOAH) study. *Hypertension Research: Official Journal of the Japanese Society of Hypertension*. 2008 Jun; 31(6):1135–45. Epub 2008/08/22. eng.
11. Tsuchikura S, Shoji T, Kimoto E, Shinohara K, Hatsuda S, Koyama H, et al. Brachial-ankle pulse wave velocity as an index of central arterial stiffness. *Journal of Atherosclerosis and Thrombosis*. 2010 Jun 30; 17(6):658–65. PMID: 20467192
12. Yamashina A, Tomiyama H, Arai T, Hirose K, Koji Y, Hirayama Y, et al. Brachial-ankle pulse wave velocity as a marker of atherosclerotic vascular damage and cardiovascular risk. *Hypertension Research: Official Journal of the Japanese Society of Hypertension*. 2003 Aug; 26(8):615–22.
13. Cortez-Cooper MY, Supak JA, Tanaka H. A new device for automatic measurements of arterial stiffness and ankle-brachial index. *The American Journal of Cardiology*. 2003 Jun 15; 91(12):1519–22. A9. PMID: 12804752

14. Yamashina A, Tomiyama H, Takeda K, Tsuda H, Arai T, Hirose K, et al. Validity, reproducibility, and clinical significance of noninvasive brachial-ankle pulse wave velocity measurement. *Hypertension Research: Official Journal of the Japanese Society of Hypertension*. 2002 May; 25(3):359–64.
15. Wang JW, Zhou ZQ, Hu DY. Prevalence of arterial stiffness in North China, and associations with risk factors of cardiovascular disease: a community-based study. *BMC Cardiovascular Disorders*. 2012; 12:119. <https://doi.org/10.1186/1471-2261-12-119> PMID: 23217203
16. Ninomiya T, Kojima I, Doi Y, Fukuhara M, Hirakawa Y, Hata J, et al. Brachial-ankle pulse wave velocity predicts the development of cardiovascular disease in a general Japanese population: the Hisayama Study. *Journal of Hypertension*. 2013 Mar; 31(3):477–83; discussion 83. <https://doi.org/10.1097/HJH.0b013e32835c5c23> PMID: 23615210
17. Vlachopoulos C, Aznaouridis K, Terentes-Printzios D, Ioakeimidis N, Stefanadis C. Prediction of cardiovascular events and all-cause mortality with brachial-ankle elasticity index: a systematic review and meta-analysis. *Hypertension*. 2012 Aug; 60(2):556–62. Epub 2012/06/27. eng. <https://doi.org/10.1161/HYPERTENSIONAHA.112.194779> PMID: 22733468
18. Sheng CS, Li Y, Li LH, Huang QF, Zeng WF, Kang YY, et al. Brachial-ankle pulse wave velocity as a predictor of mortality in elderly Chinese. *Hypertension*. 2014 Nov; 64(5):1124–30. <https://doi.org/10.1161/HYPERTENSIONAHA.114.04063> PMID: 25259749
19. Han JY, Choi DH, Choi SW, Kim BB, Ki YJ, Chung JW, et al. Predictive value of brachial-ankle pulse wave velocity for cardiovascular events. *The American Journal of the Medical Sciences*. 2013 Aug; 346(2):92–7. <https://doi.org/10.1097/MAJ.0b013e318268c05a> PMID: 23085673
20. Chung CM, Yang TY, Lin YS, Chang ST, Hsiao JF, Pan KL, et al. Relation of arterial stiffness assessed by brachial-ankle pulse wave velocity to complexity of coronary artery disease. *The American Journal of the Medical Sciences*. 2014 Oct; 348(4):294–9. <https://doi.org/10.1097/MAJ.0000000000000285> PMID: 24845468
21. Ai ZS, Li J, Liu ZM, Fan HM, Zhang DF, Zhu Y, et al. Reference value of brachial-ankle pulse wave velocity for the eastern Chinese population and potential influencing factors. *Brazilian Journal of Medical and Biological Research = Revista Brasileira de Pesquisas Medicas e Biologicas / Sociedade Brasileira de Biofisica [et al]*. 2011 Oct; 44(10):1000–5.
22. Snijder MB, Stronks K, Agyemang C, Busschers WB, Peters RJ, van den Born BJ. Ethnic differences in arterial stiffness the Helius study. *International Journal of Cardiology*. 2015 Jul 15; 191:28–33. <https://doi.org/10.1016/j.ijcard.2015.04.234> PMID: 25965592
23. Ohnishi H, Saitoh S, Takagi S, Ohata J, Isobe T, Kikuchi Y, et al. Pulse wave velocity as an indicator of atherosclerosis in impaired fasting glucose: the Tanno and Sobetsu study. *Diabetes Care*. 2003 Feb; 26(2):437–40. PMID: 12547876
24. Xie X, Ma YT, Yang YN, Fu ZY, Li XM, Huang D, et al. Polymorphisms in the SAA1/2 gene are associated with carotid intima media thickness in healthy Han Chinese subjects: the Cardiovascular Risk Survey. *PloS One*. 2010; 5(11):e13997. <https://doi.org/10.1371/journal.pone.0013997> PMID: 21103356
25. Pan S, Yu ZX, Ma YT, Liu F, Yang YN, Ma X, et al. Appropriate body mass index and waist circumference cutoffs for categorization of overweight and central adiposity among Uighur adults in Xinjiang. *PloS One*. 2013; 8(11):e80185. <https://doi.org/10.1371/journal.pone.0080185> PMID: 24244645
26. Kim J, Song TJ, Song D, Lee KJ, Kim EH, Lee HS, et al. Brachial-ankle pulse wave velocity is a strong predictor for mortality in patients with acute stroke. *Hypertension*. 2014 Aug; 64(2):240–6. <https://doi.org/10.1161/HYPERTENSIONAHA.114.03304> PMID: 24821942
27. Toto-Moukouo JJ, Achimastos A, Asmar RG, Hugues CJ, Safar ME. Pulse wave velocity in patients with obesity and hypertension. *American Heart Journal*. 1986 Jul; 112(1):136–40. PMID: 3728268
28. Levenson J, Simon AC, Cambien FA, Beretti C. Cigarette smoking and hypertension. Factors independently associated with blood hyperviscosity and arterial rigidity. *Arteriosclerosis*. 1987 Nov-Dec; 7(6):572–7. PMID: 3689203
29. Sawabe M, Takahashi R, Matsushita S, Ozawa T, Arai T, Hamamatsu A, et al. Aortic pulse wave velocity and the degree of atherosclerosis in the elderly: a pathological study based on 304 autopsy cases. *Atherosclerosis*. 2005 Apr; 179(2):345–51. <https://doi.org/10.1016/j.atherosclerosis.2004.09.023> PMID: 15777552
30. Miyai N, Utsumi M, Gowa Y, Igarashi Y, Miyashita K, Takeda S, et al. Age-specific nomogram of brachial-ankle pulse wave velocity in Japanese adolescents. *Clinical and Experimental Hypertension (New York, NY)*. 1993; 35(2):95–101.
31. Takahashi R, Imamura A, Yoshikane M, Suzuki M, Murakami R, Cheng XW, et al. Very small low-density lipoprotein cholesterol level is a determinant of arterial stiffness in men with impaired glucose metabolism. *Journal of Atherosclerosis and Thrombosis*. 2010 Dec 26; 17(12):1282–9. PMID: 20834193

32. Adams MR, Williams JK, Kaplan JR. Estrogens, progestins, and atherosclerosis. *Arterioscler Thromb Vasc Biol.* 2004 Nov; 24(11):e190; author reply e190-1. <https://doi.org/10.1161/01.ATV.0000146176.62463.87> PMID: [15528488](https://pubmed.ncbi.nlm.nih.gov/15528488/)
33. Rajkumar C, Kingwell BA, Cameron JD, Waddell T, Mehra R, Christophidis N, et al. Hormonal therapy increases arterial compliance in postmenopausal women. *J Am Coll Cardiol.* 1997 Aug; 30(2):350–6. PMID: [9247504](https://pubmed.ncbi.nlm.nih.gov/9247504/)
34. Smulyan H, Asmar RG, Rudnicki A, London GM, Safar ME. Comparative effects of aging in men and women on the properties of the arterial tree. *J Am Coll Cardiol.* 2001 Apr; 37(5):1374–80. PMID: [11300449](https://pubmed.ncbi.nlm.nih.gov/11300449/)
